# Supplementary material for: Post-Colonization Interval Estimates Using Multi-Species Calliphoridae Larval Masses and Spatially Distinct Temperature Data Sets: A Case Study
Source: Insects. 2017 Apr 4;8(2):40. doi: 10.3390/insects8020040 (PMC5492054; doi:10.3390/insects8020040)
Supplement: Supplementary file 1 [file insects-08-00040-s001.pdf]

# Supplementary Materials: Post-Colonization Interval Estimates Using Multi-Species Calliphoridae Larval Masses and Spatially Distinct Temperature Data Sets: A Case Study

Courtney R. Weatherbee, Jennifer L. Pechal, Trevor Stamper and M. Eric Benbow

**Table S1.** Number of larvae, and third instars specifically, collected per carcass at each sampling period. Total larvae refers to all instars collected: first, second, and third. Larval data begins at 48 h since carcass placement, as that was the first sampling period when larval masses were present. “X”s indicate times when no larval masses were present for that carcass.

| Time Since Carcass Placement (h) | Carcass | Total Larvae | Total 3 <sup>rd</sup> Instars Collected | <i>Cochliomyia Macellaria</i> 3 <sup>rd</sup> Instars | <i>Lucilia coeruleiviridis</i> 3 <sup>rd</sup> Instars | <i>Phormia Regina</i> 3 <sup>rd</sup> Instars |
|----------------------------------|---------|--------------|-----------------------------------------|-------------------------------------------------------|--------------------------------------------------------|-----------------------------------------------|
| 48                               | 1       | 197          | 11                                      | 7                                                     | 0                                                      | 4                                             |
|                                  | 2       | 106          | 24                                      | 7                                                     | 0                                                      | 17                                            |
|                                  | 3       | 139          | 7                                       | 6                                                     | 1                                                      | 0                                             |
|                                  | 4       | X            | X                                       | X                                                     | X                                                      | X                                             |
|                                  | 5       | X            | X                                       | X                                                     | X                                                      | X                                             |
|                                  | 6       | X            | X                                       | X                                                     | X                                                      | X                                             |
| 60                               | 1       | 98           | 56                                      | 35                                                    | 1                                                      | 20                                            |
|                                  | 2       | 80           | 31                                      | 16                                                    | 7                                                      | 8                                             |
|                                  | 3       | 199          | 44                                      | 24                                                    | 5                                                      | 15                                            |
|                                  | 4       | 32           | 19                                      | 7                                                     | 2                                                      | 10                                            |
|                                  | 5       | 39           | 15                                      | 5                                                     | 5                                                      | 5                                             |
|                                  | 6       | 91           | 15                                      | 11                                                    | 4                                                      | 0                                             |
| 72                               | 1       | 97           | 68                                      | 49                                                    | 5                                                      | 14                                            |
|                                  | 2       | 43           | 25                                      | 14                                                    | 5                                                      | 6                                             |
|                                  | 3       | 53           | 48                                      | 8                                                     | 3                                                      | 37                                            |
|                                  | 4       | 22           | 21                                      | 5                                                     | 0                                                      | 16                                            |
|                                  | 5       | 42           | 36                                      | 5                                                     | 2                                                      | 29                                            |
|                                  | 6       | 36           | 31                                      | 8                                                     | 7                                                      | 16                                            |
| 84                               | 1       | 21           | 19                                      | 6                                                     | 0                                                      | 13                                            |
|                                  | 2       | 20           | 17                                      | 4                                                     | 9                                                      | 4                                             |
|                                  | 3       | 23           | 19                                      | 4                                                     | 11                                                     | 4                                             |
|                                  | 4       | 20           | 19                                      | 3                                                     | 11                                                     | 5                                             |
|                                  | 5       | 18           | 16                                      | 1                                                     | 0                                                      | 15                                            |
|                                  | 6       | 18           | 15                                      | 1                                                     | 9                                                      | 5                                             |
| 96                               | 1       | 32           | 28                                      | 3                                                     | 5                                                      | 20                                            |
|                                  | 2       | 35           | 33                                      | 2                                                     | 3                                                      | 28                                            |
|                                  | 3       | 18           | 15                                      | 1                                                     | 2                                                      | 12                                            |
|                                  | 4       | 17           | 15                                      | 1                                                     | 10                                                     | 4                                             |
|                                  | 5       | 16           | 16                                      | 2                                                     | 0                                                      | 14                                            |
|                                  | 6       | 61           | 15                                      | 2                                                     | 4                                                      | 9                                             |
| 108                              | 1       | 10           | 8                                       | 0                                                     | 0                                                      | 8                                             |
|                                  | 2       | 1            | 1                                       | 0                                                     | 0                                                      | 1                                             |
|                                  | 3       | 7            | 6                                       | 1                                                     | 1                                                      | 4                                             |
|                                  | 4       | 12           | 12                                      | 3                                                     | 2                                                      | 7                                             |
|                                  | 5       | 11           | 8                                       | 0                                                     | 0                                                      | 8                                             |
|                                  | 6       | 5            | 5                                       | 0                                                     | 2                                                      | 3                                             |
| 120                              | 1       | 19           | 19                                      | 0                                                     | 0                                                      | 19                                            |
|                                  | 2       | 11           | 11                                      | 0                                                     | 0                                                      | 11                                            |
|                                  | 3       | 18           | 18                                      | 0                                                     | 6                                                      | 12                                            |
|                                  | 4       | 14           | 14                                      | 0                                                     | 0                                                      | 14                                            |
|                                  | 5       | 39           | 38                                      | 0                                                     | 2                                                      | 36                                            |
|                                  | 6       | 22           | 18                                      | 0                                                     | 1                                                      | 17                                            |
| 132                              | 1       | 19           | 19                                      | 2                                                     | 0                                                      | 17                                            |
|                                  | 2       | X            | X                                       | X                                                     | X                                                      | X                                             |
|                                  | 3       | X            | X                                       | X                                                     | X                                                      | X                                             |

|     |   |    |    |   |   |    |
|-----|---|----|----|---|---|----|
| 144 | 4 | 22 | 22 | 4 | 1 | 17 |
|     | 5 | 27 | 25 | 1 | 0 | 24 |
|     | 6 | 32 | 23 | 2 | 3 | 18 |
|     | 1 | 23 | 23 | 2 | 3 | 18 |
|     | 2 | X  | X  | X | X | X  |
|     | 3 | X  | X  | X | X | X  |
| 156 | 4 | X  | X  | X | X | X  |
|     | 5 | 16 | 15 | 2 | 1 | 12 |
|     | 6 | X  | X  | X | X | X  |
|     | 1 | 23 | 23 | 4 | 4 | 15 |
|     | 2 | X  | X  | X | X | X  |
|     | 3 | X  | X  | X | X | X  |
|     | 4 | X  | X  | X | X | X  |
|     | 5 | X  | X  | X | X | X  |
|     | 6 | X  | X  | X | X | X  |

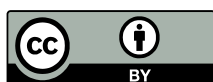

© 2017 by the authors. Submitted for possible open access publication under the terms and conditions of the Creative Commons Attribution (CC BY) license (<http://creativecommons.org/licenses/by/4.0/>).
